# Supplementary material
Source: Springer Nature journal article supplement (https://www.springermedizin.de/resource/supplementary/12885_2014_5055_MOESM1_ESM.pdf/9468260)
Supplement: MOESM1 [file 9468260]

**Additional Table 1 The Health Care Financing Administration Common Procedure Coding System or National Drug Code for drugs**

| <b>Drug</b>  | <b>Code</b>                                                                                                                                                       |
|--------------|-------------------------------------------------------------------------------------------------------------------------------------------------------------------|
| 5-FU         | J9190, J9200, 00013103691, 63323011710                                                                                                                            |
| capecitabine | J8520, J8521, 54868414300, 54868526002, 54868526000,<br>54868526001, 00004110022, 00004110013, 00004110151,<br>00004110051, 00004110020, 00004110116, 00004110150 |
| oxaliplatin  | J9263, C9205                                                                                                                                                      |

**Abbreviation:** 5-FU: 5-fluorouracil;
